# Supplementary material for: Investigating the Relationships between Basic Tastes Sensitivities, Fattiness Sensitivity, and Food Liking in 11-Year-Old Children
Source: PubMed Central journal article supplement (PMC7554820; doi:10.3390/foods9091315), 2020-09-18
Supplement: foods-09-01315-s001.pdf [file foods-09-01315-s001.pdf]

**Table 1.** Food list and percentage of children who were familiar with the foods.

| <b>Food</b>              | <b>Taste Profile</b> | <b>Familiarity (Children Who Have Tasted the Food, in %)</b> |
|--------------------------|----------------------|--------------------------------------------------------------|
| Strawberry jam           | Sweet                | 96%                                                          |
| Sweetened soft drink     | Sweet                | 97%                                                          |
| Caramel pudding          | Sweet, fatty         | 70%                                                          |
| Chocolate milk           | Sweet, fatty         | 96%                                                          |
| Sweet bread with filling | Sweet, fatty         | 91%                                                          |
| Brownies                 | Sweet, fatty         | 99%                                                          |
| Doughnut                 | Sweet, fatty         | 92%                                                          |
| Ice cream                | Sweet, fatty         | 99%                                                          |
| Brussels sprouts         | Bitter               | 61%                                                          |
| Green onion              | Bitter               | 85%                                                          |
| Spinach                  | Bitter               | 66%                                                          |
| Broccoli                 | Bitter               | 95%                                                          |
| Dark chocolate           | Bitter               | 97%                                                          |
| Soy sauce                | Salty, umami         | 79%                                                          |
| Cod                      | Salty, umami         | 87%                                                          |
| Tomato soup              | Salty, umami, fatty  | 94%                                                          |
| Fish fingers             | Salty, umami, fatty  | 93%                                                          |
| Fish cake                | Salty, umami         | 92%                                                          |
| Sausage                  | Salty, fatty         | 97%                                                          |
| Hamburger                | Salty, fatty         | 98%                                                          |
| Pizza                    | Salty, fatty         | 96%                                                          |
| Chips                    | Salty, fatty         | 98%                                                          |
| Soft cheese              | Salty, fatty         | 91%                                                          |
| Butter                   | Fatty                | 94%                                                          |
| Avocado                  | Fatty                | 78%                                                          |
| Blueberry                | Sour                 | 96%                                                          |
| Kiwi                     | Sour                 | 87%                                                          |
| Mandarin                 | Sour                 | 92%                                                          |
| Rhubarb                  | Sour                 | 67%                                                          |
| Sour candy               | Sour                 | 97%                                                          |
| <b>Taste</b>             | <b>N</b>             | <b>Average Familiarity (% of children) *</b>                 |
| Sweet                    | 8                    | 92.5%                                                        |
| Sour                     | 5                    | 90.0%                                                        |
| Salty                    | 10                   | 92.2%                                                        |
| Bitter                   | 5                    | 81.1%                                                        |
| Umami                    | 5                    | 88.0%                                                        |
| Fatty                    | 15                   | 92.3%                                                        |

\* Average percentage of children who have tasted the N foods from the food list representing sweet, sour, salty, bitter, umami, and fatty taste, respectively.
